# Supplementary material for: Biologically active thiosemicarbazone Fe chelators and their reactions with ferrioxamine B and ferric EDTA; a kinetic study
Source: Royal Society of Chemistry journal article supplement (doi:10.1039/c1dt11685a), 2011-12-19
Supplement: c1dt11685a.pdf [file c1dt11685a.pdf]

## **Biologically Active Thiosemicarbazone Fe Chelators and their Reactions with Ferrioxamine B and Ferric EDTA; a Kinetic Study**

*Paul V. Bernhardt,<sup>a</sup> Manuel Martínez,<sup>\*b</sup> Carlos Rodríguez,<sup>b</sup> and Marta Vazquez.<sup>b</sup>*

<sup>a</sup> School of Chemistry and Molecular Biosciences, University of Queensland, Brisbane 4072, AUSTRALIA

<sup>b</sup> Departament de Química Inorgànica, Universitat de Barcelona, Martí i Franquès 1-11, E-08028 Barcelona, SPAIN

**Supporting Information**

**Table S1.-** Observed rate constants determined for the different systems as a function of the variables used in the study.

| Reaction                                        | pH  | $I$<br>/M | $T$<br>/°C | $P$<br>/atm | % DMSO | $10^3 \times [\text{TSC}]$<br>/M | $10^4 \times k_{\text{obs1}}$<br>/s <sup>-1</sup> | $10^5 \times k_{\text{obs2}}$<br>/s <sup>-1</sup> | $10^5 \times k_{\text{obs3}}$<br>/s <sup>-1</sup> |
|-------------------------------------------------|-----|-----------|------------|-------------|--------|----------------------------------|---------------------------------------------------|---------------------------------------------------|---------------------------------------------------|
| HAp44mT $E \rightleftharpoons Z$ , 0.08 M PIPPS | 4.5 | 0.27      | 62         | 1           | 23     | 0.01-0.03 range                  | 19                                                | -                                                 | -                                                 |
|                                                 | 4.8 |           |            |             |        |                                  | 12                                                | -                                                 | -                                                 |
|                                                 | 5.0 |           |            |             |        |                                  | 6.5                                               | -                                                 | -                                                 |
| HAp44mT $E \rightleftharpoons Z$ , 0.08 M MES   | 5.1 | 0.60      | 60         |             |        |                                  | 3.8                                               | -                                                 | -                                                 |
|                                                 | 5.1 | 0.10      | 60         | 1           | 23     |                                  | 3.3                                               | -                                                 | -                                                 |
|                                                 |     | 0.60      |            |             |        | 4.0                              | -                                                 | -                                                 |                                                   |
|                                                 |     | 1.0       |            |             |        | 3.8                              | -                                                 | -                                                 |                                                   |
|                                                 | 5.2 | 0.27      | 62         |             |        |                                  | 5.2                                               | -                                                 | -                                                 |
|                                                 |     |           |            |             |        |                                  | 5.5                                               | 0.12                                              | -                                                 |
|                                                 | 5.5 |           |            | 41          | 1      | 23                               | 0.35                                              | -                                                 | -                                                 |
|                                                 |     |           |            | 51          |        |                                  | 0.81                                              | -                                                 | -                                                 |
|                                                 |     |           |            | 58          |        |                                  | 1.9                                               | -                                                 | -                                                 |
|                                                 |     |           |            |             |        |                                  | 1.9                                               | -                                                 | -                                                 |
|                                                 |     |           |            |             |        |                                  | 1.9                                               | -                                                 | -                                                 |
| 5.7                                             |     |           | 60         | 300         | 62     | 1.9                              | -                                                 | -                                                 |                                                   |
|                                                 |     |           |            | 600         |        | 1.9                              | -                                                 | -                                                 |                                                   |
|                                                 |     |           |            | 900         |        | 1.9                              | -                                                 | -                                                 |                                                   |
|                                                 |     |           |            | 1200        |        | 1.9                              | -                                                 | -                                                 |                                                   |
|                                                 |     |           |            | 1500        |        | 1.8                              | -                                                 | -                                                 |                                                   |
| 6.0                                             |     |           | 60         | 1           | 23     | 1.6                              | -                                                 | -                                                 |                                                   |
|                                                 |     |           |            |             |        | 2.1                              | -                                                 | -                                                 |                                                   |
| 6.5                                             |     |           | 62         |             |        | 2.3                              | -                                                 | -                                                 |                                                   |
|                                                 |     |           |            |             |        | 2.5                              | -                                                 | -                                                 |                                                   |
| 5.7                                             |     |           |            |             |        | 1.4                              | -                                                 | -                                                 |                                                   |
| 6.0                                             |     |           |            |             |        | 0.69                             | -                                                 | -                                                 |                                                   |
| HAp4mT $E \rightleftharpoons Z$ , 0.08 M MES    | 5.5 | 0.27      | 60         |             | 23     |                                  | 0.075                                             | -                                                 | -                                                 |
| HAp4pT $E \rightleftharpoons Z$ , 0.08 M MES    | 5.2 |           | 60         |             | 62     |                                  | 0.088                                             | -                                                 | -                                                 |

|                                                                  |     |      |    |   |    |                    |       |                |   |
|------------------------------------------------------------------|-----|------|----|---|----|--------------------|-------|----------------|---|
|                                                                  | 5.5 |      | 55 |   |    |                    | 0.034 | -              | - |
|                                                                  |     |      | 62 |   |    |                    | 0.093 | -              | - |
|                                                                  |     |      | 69 |   |    |                    | 0.25  | -              | - |
|                                                                  |     |      | 76 |   |    |                    | 0.51  | -              | - |
| HAp4pT $E \rightleftharpoons Z$ , 0.08 M PIPPS                   | 6.0 |      | 60 |   |    |                    | 0.049 | -              | - |
|                                                                  | 4.5 |      | 60 |   |    |                    | 0.29  | -              | - |
|                                                                  | 4.8 |      |    |   |    |                    | 0.22  | -              | - |
| HAp4mT + (1-5)×10 <sup>-5</sup> M range [Fe(HDFO)] <sup>+</sup>  | 5.5 | 0.27 | 70 | 1 | 23 | 5.0                | 1.6   |                | - |
|                                                                  |     |      |    |   |    | 8.0                | 2.4   | Average        | - |
|                                                                  |     |      |    |   |    | 9.5                | 2.5   | 0.030          | - |
|                                                                  |     |      |    |   |    | 13                 | 3.2   |                | - |
|                                                                  |     |      |    |   |    | 15                 | 4.4   |                | - |
|                                                                  | 6.0 | 0.27 | 70 |   | 23 | 5.0                | 0.90  | not determined | - |
|                                                                  |     |      |    |   |    | 8.0                | 1.4   | not determined | - |
|                                                                  |     |      |    |   |    | 9.5                | 1.6   | not determined | - |
|                                                                  | 6.5 | 0.27 | 70 |   | 23 | 2.0                | 0.29  |                | - |
|                                                                  |     |      |    |   |    | 5.0                | 0.52  | Average        | - |
|                                                                  |     |      |    |   |    | 8.0                | 0.82  | 0.060          | - |
|                                                                  |     |      |    |   |    | 9.5                | 1.1   |                | - |
|                                                                  | 7.5 | 0.27 | 70 |   | 23 | 2.0                | 0.25  |                | - |
|                                                                  |     |      |    |   |    | 5.0                | 0.40  | Average        | - |
|                                                                  |     |      |    |   |    | 8.0                | 0.57  | 0.050          | - |
|                                                                  |     |      |    |   |    | 9.5                | 0.65  |                | - |
| HAp44mT + (1-5)×10 <sup>-5</sup> M range [Fe(HDFO)] <sup>+</sup> | 5.5 | 0.27 | 55 |   | 23 | 2.0                | 5.0   | 4.0            | - |
|                                                                  |     |      |    |   |    | 5.0                | 13    | 4.5            | - |
|                                                                  |     |      |    |   |    | 8.0                | 20    | -              | - |
|                                                                  |     |      |    |   |    | 9.5                | 23    | 3.0            | - |
|                                                                  |     |      | 60 |   | 23 | 2.0                | 18    | 6.0            | - |
|                                                                  |     |      |    |   |    | 2.0 (equilibrated) | 5.4   | 5.5            | - |
|                                                                  |     |      |    |   |    | 5.0                | 36    | -              | - |

|                                                                                    |     |      |    |         |                    |         |         |         |
|------------------------------------------------------------------------------------|-----|------|----|---------|--------------------|---------|---------|---------|
| HAp44mT + $(1-5) \times 10^{-5}$ M range [Fe(EDTA)(H <sub>2</sub> O)] <sup>-</sup> | 6.5 | 0.27 | 55 | 40      | 5.0 (equilibrated) | 19      | 6.0     | -       |
|                                                                                    |     |      |    |         | 8.0                | 49      | -       | -       |
|                                                                                    | 7.4 | 0.27 | 55 |         | 8.0 (equilibrated) | 30      | 5.5     | -       |
|                                                                                    |     |      |    |         | 9.5                | 63      | 5.0     | -       |
|                                                                                    |     |      |    |         | 2.0                | 1.8     | 3.0     | -       |
|                                                                                    |     |      |    |         | 5.0                | 4.2     | 4.5     | -       |
|                                                                                    |     |      |    |         | 8.0                | 6.2     | 4.0     | -       |
|                                                                                    | 7.5 | 0.27 | 55 |         | 9.5                | 7.3     | 3.0     | -       |
|                                                                                    |     |      |    |         | 2.0                | 1.4     | 2.3     | -       |
|                                                                                    |     |      |    |         | 5.0                | 2.4     | 2.3     | -       |
|                                                                                    |     |      |    |         | 8.0                | 4.0     | 2.4     | -       |
|                                                                                    |     |      |    |         | 9.5                | 4.6     | 2.5     | -       |
|                                                                                    | 5.5 | 0.27 | 50 |         | 2.0                | 1.4     | 2.3     | -       |
|                                                                                    |     |      |    |         | 5.0                | 2.0     | 2.3     | -       |
|                                                                                    |     |      |    |         | 8.0                | 3.3     | 2.4     | -       |
|                                                                                    |     |      |    |         | 9.5                | 4.2     | 2.5     | -       |
|                                                                                    |     |      |    |         | 2.0-9.0 range      | Average | Average | Average |
|                                                                                    | 6.5 |      | 60 |         |                    | 0.92    | 10      | 0.68    |
|                                                                                    |     |      |    |         |                    | Average | Average | Average |
|                                                                                    |     |      |    |         |                    | 2.1     | 16      | 1.7     |
|                                                                                    |     |      |    | Average | Average            | Average |         |         |
|                                                                                    |     |      |    | 3.3     | 40                 | 4.0     |         |         |
| 6.5                                                                                |     | 60   |    | Average | Average            | Average |         |         |
|                                                                                    |     |      |    | 0.18    | 12                 | 1.2     |         |         |
|                                                                                    |     |      |    | Average | Average            | Average |         |         |
|                                                                                    |     | 70   |    | 0.58    | 30                 | 3.0     |         |         |

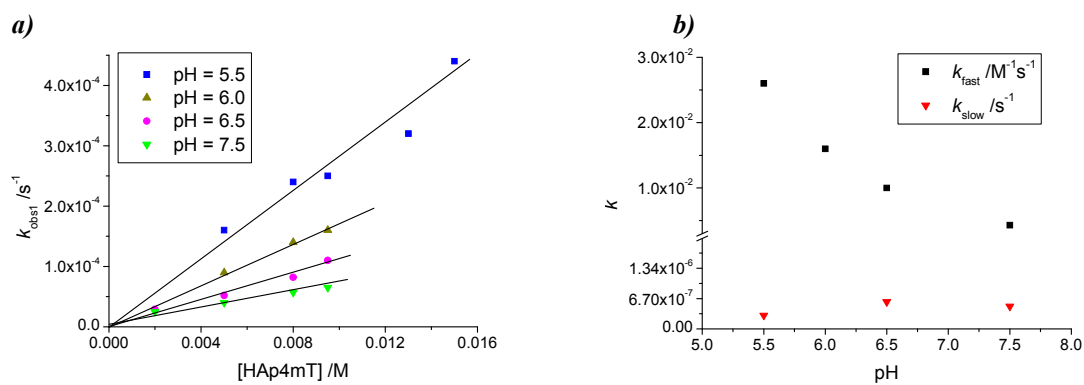

**Figure S1.-** *a)* Dependence on the concentration of HAp4mT for the faster process observed on its addition to a  $\text{Fe}^{\text{III}}$ /DFO solution at 70 °C; *b)* pH profile of the values derived from  $k_{\text{fast}}$  and  $k_{\text{slow}}$  for the same reaction.

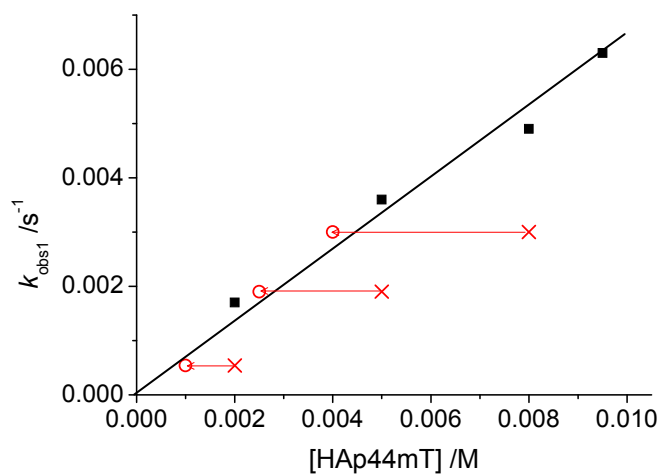

**Figure S2.-** Dependence on the concentration of the ligand for the reaction of freshly recrystallized HAp44mT with the  $\text{Fe}^{\text{III}}$ /DFO system at 60 °C and pH = 5.5. Crosses indicate the data obtained after isomeric equilibration and the empty circles its position once the *EZ thiolate* relative proportion is considered.
